# Supplementary material
Source: Springer Nature journal article supplement (https://www.springermedizin.de/resource/supplementary/12936_2006_339_MOESM5_ESM.pdf/9547588)

1 2 3 4 5 6 7 8 9 10

800 bp -

600 bp -

400 bp -

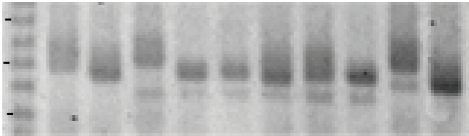

Supplement: MOESM5 [file 9547588]
